1 *Type of the Paper: Article*

# 2 **Ecology and population genetics of the parasitoid** 3 ***Phobocampe confusa* (Hymenoptera: Ichneumonidae)** 4 **in relation to its hosts, *Aglais* species (Lepidoptera:** 5 **Numphalidae).**

6 **Hélène Audusseau<sup>1,2\*</sup>, Gaspard Baudrin<sup>3,4,5</sup>, Mark R. Shaw<sup>6</sup>, Naomi L.P. Keehnen<sup>1</sup>, Reto Schmucki<sup>2</sup>,**  
7 **Lise Dupont<sup>3,4,5</sup>.**

8 <sup>1</sup> Department of Zoology, Stockholm University, Stockholm, Sweden

9 <sup>2</sup> UK Centre for Ecology & Hydrology, Wallingford, United Kingdom

10 <sup>3</sup> Univ Paris-Est Creteil, CNRS, INRAE, IRD, IEES-Paris, F-94010 Creteil France

11 <sup>4</sup> Sorbonne Université, IEES-Paris, F-75005 Paris, France

12 <sup>5</sup> Université de Paris, IEES-Paris, F-75013 Paris, France

13 <sup>6</sup> National Museums of Scotland, Chambers Street, Edinburgh, United Kingdom

14

15 \* Correspondence: [helene.audusseau@zoologi.su.se](mailto:helene.audusseau@zoologi.su.se)

16 **Abstract:** The biology of parasitoids in natural ecosystems remain very poorly studied, while they are  
17 key species for their functioning. Here we focused on *Phobocampe confusa*, a vanessines specialist,  
18 responsible for high mortality rates in very emblematic butterfly species in Europe (genus *Aglais*). We  
19 studied its ecology and genetic structure in connection with those of its host butterflies in Sweden. To  
20 this aim, we gathered data from 428 *P. confusa* individuals reared from 6094 butterfly larvae (of *A.*  
21 *urticae*, *A. io* and in two occasions of *Araschnia levana*) collected over two years (2017 and 2018) and 19  
22 sites distributed along a 500 km latitudinal gradient. We found that *P. confusa* is widely distributed  
23 along the latitudinal gradient. Its distribution is constrained over time by the phenology of its hosts.  
24 The large variation in climatic conditions between sampling years explains the decrease in  
25 phenological overlap between *P. confusa* and its hosts in 2018 and the 33.5% decrease in the number  
26 of butterfly larvae infected. At least in this study, *P. confusa* seems to favour *A. urticae* as host: while it  
27 parasitized nests of *A. urticae* and *A. io* equally, the proportion of larvae is significantly higher for *A.*  
28 *urticae*. At the landscape scale, *P. confusa* is almost exclusively found in vegetated open land and near  
29 deciduous forests, whereas artificial habitats are negatively correlated with the likelihood of a nest to  
30 be parasitized. The genetic analyses on 89 adult *P. confusa* and 87 adult *A. urticae* using COI and AFLP  
31 markers reveal a low genetic diversity in *P. confusa* and a lack of population genetic structure in both  
32 species, at the scale of our sampling. Further genetic studies using high-resolution genomics tools will  
33 be required to better understand the population genetic structure of *P. confusa*, its biotic interactions  
34 with its hosts, and ultimately the stability and the functioning of natural ecosystems.

35 **Keywords:** *A. urticae*, *A. io*, genetic variation, landscape heterogeneity, phenology.

36

---

## 37 **1. Introduction**

38 Most biological studies of parasitoids have been done in the context of biocontrol in agricultural  
39 ecosystems. Such focus on parasitoids specialized on pest species, however, has limited our knowledge  
40 on the biology and function of parasitoids in natural ecosystems. For example, only a few of the over  
41 100 000 ichneumonid species estimated are identified to date [1] and the biology and ecology of the vast  
42 majority of these species remain poorly understood [2–4]. Thus, while parasitoids constitute a large  
43 part of the biodiversity and are key species in the functioning of ecosystems, they have been widely  
44 neglected in ecological studies [3–7].

45 It is generally accepted that parasitoid species are sensitive to the interactions and population  
46 dynamics of their hosts and have their own habitat requirements [4]. However, little empirical evidence  
47 exists to adequately inform these processes and our knowledge of the ecology of most parasitoids is  
48 often based on sparse data obtained from a few randomly captured specimens [4]. The lack of data sets  
49 derived from systematic sampling limits our understanding of their distribution, in space and time, as  
50 well as the processes that drive their dynamics. Both the dynamics and the distribution of parasitoids  
51 are expected to be conditioned to that of their hosts [8]. This is also supported by studies of population  
52 genetic structure showing that parasitoids can track, locate and shift to different hosts in fragmented  
53 landscapes (reviewed in [9]). Comparing the spatial genetic structure of parasitoids with that of their  
54 hosts is a powerful approach that can provide essential understanding of species' ecology and biotic  
55 interactions. The occurrence and survival of parasitoid populations also depend on a set of features of  
56 the habitat [10]. For example, the presence of sources of sugar and proteins during the reproductive  
57 season and appropriate shelters for overwintering are good indicators of habitat suitability for  
58 parasitoids (reviewed in [4,11]). At the landscape scale, however, the persistence of the parasitoid  
59 species is also likely to depend on their capability to disperse between suitable habitat patches. By  
60 affecting dispersal, habitat fragmentation and homogenization can have a negative impact on the  
61 population dynamics of parasitoids [12–14], with larger effects for species with limited dispersal  
62 capability [15,16]. The impact of habitat fragmentation on parasitoids is further exacerbated by the fact  
63 that they often occur at low densities, in populations that are therefore more likely to be vulnerable to  
64 changes [14,10]. The persistence of a population at a site is therefore the result of the interplay between  
65 local habitat suitability, species' capacity to disperse between patches and the distribution in time and  
66 space of its potential hosts in the landscape.

67 *Phobocampe confusa* is an important parasitoid of emblematic butterfly species in Europe (genus  
68 *Aglaais*). In Sweden, *P. confusa* represents the second cause of larval mortality due to parasitism in *A.*  
69 *urticae* and *A. io* [17]. *P. confusa* is an ichneumonid of the Campopleginae subfamily. It is a solitary  
70 endoparasitic koinobiont, that is, the female lays an egg in the body of its host, which continues to  
71 function and feed until the parasitoid larva emerges, in this case before the pupation of its host. The  
72 parasitoid overwinters as a pharate adult in the cocoon [18]. As in Hymenoptera generally, the sex-  
73 determination system of the species is haplodiploid, that is, females develop from fertilized eggs and  
74 are diploid, while males develop from unfertilized eggs and are haploid. The species is known to be a  
75 partly plurivoltine vanessine specialist and to parasitize the butterflies *Aglaais io*, *Aglaais urticae*, *Araschnia*  
76 *levana*, *Nymphalis polychloros* and *Polygonia c-album* [18], most often the first two. Although its effect on  
77 the abundance and dynamics of its hosts can be noticeable, the biology of *P. confusa* has not yet been  
78 systematically studied.

79 Here, we studied the ecology of *P. confusa* and how it interacts with its host butterfly species. We  
80 aimed to (i) identify the temporal constraints imposed by the phenology of its main host species in  
81 Sweden, *A. urticae* and *A. io*, (ii) investigate preference of hosts, and (iii) better understand the  
82 distribution of this parasitoid species in the landscape. In addition, as the population dynamic of  
83 parasitoids are likely to be closely linked to that of their hosts, (iv) we characterized and contrasted the  
84 genetic structure of *P. confusa* with one of its main host, *A. urticae*, to explore the potential biotic  
85 constraint induced by the host on the parasitoid and its dispersal.

## 86 2. Materials and Methods

### 87 2.1. Host butterflies

88 *Phobocampe confusa* has been recorded to parasitize several vanessine Nymphalidae species but in  
89 the vast majority of the recorded cases, *P. confusa* emerged from two nettle-feeding butterfly species,  
90 *Aglaais io* and *A. urticae*. *Aglaais urticae* and *A. io* are widely distributed over most of Sweden. These species  
91 are closely related butterflies [19] and show similar ecology. They are batch-laying species of 200 to 300  
92 eggs, with larvae gregarious during the first three instars of their development, which then  
93 progressively become solitary. In Sweden, populations of *A. urticae* are partly bivoltine, depending on

94 the weather conditions, with larvae observed in the field from May to the end of August. Populations  
95 of *A. io* are univoltine in Sweden and their phenology is slightly more restricted than for *A. urticae*, with  
96 larvae observed from late May to early August. Both *Aglais* species overwinter as adults.

97 Another Nymphalidae species which has recently established in the southern half of Sweden [20],  
98 *A. levana*, has occasionally been reported to be parasitized by *P. confusa*. Its spatial and temporal  
99 distribution overlaps greatly with that of *A. urticae* and *A. io*. Like *A. urticae* and *A. io*, it almost  
100 exclusively feeds on nettle (*Urticae dioica*). The species is also batch-laying, but with comparatively  
101 reduced batch size of 10 to 40 eggs. It is an obligate bivoltine species, with larvae observed in the field  
102 from June to early September. *A. levana* overwinters in the pupal stage.

## 103 2.2. Study area and data collection

104 Here we exploit the data collected in a large-scale field study of larval parasitism of nettle-feeding  
105 butterflies and described in Audusseau et al. [17]. In brief, the data correspond to the collection of larvae  
106 of four nettle-feeding butterflies occurring in Sweden, *A. io*, *A. urticae*, *A. levana*, and *V. atalanta*, over  
107 two years (2017-2018) and 19 sites along a 500 km latitudinal gradient in Sweden (Figure 1). The sites  
108 were selected to overlap, in comparable proportions among counties, habitats dominated by either  
109 agriculture lands or forests. At each site, we sampled nests of larvae fortnightly throughout the  
110 breeding season of the four butterfly species (early May to late August), for a total of 9 samplings per  
111 site. To maximize the diversity of the parasitoid species captured, we stratified the sampling design  
112 according to the developmental stage of the larvae (larval instars collected from 2<sup>nd</sup> to 5<sup>th</sup>). This  
113 stratification enabled us to examine *P. confusa*'s attack preference for specific larval stages, as well as  
114 their time window of attack (see Material & Method in Audusseau et al. [17]). The development of  
115 butterfly larvae and the eventual emergence of parasitoids were monitored under controlled laboratory  
116 conditions. For the parasitized butterfly larvae, we recorded the larval stage and date at which  
117 parasitoids emerged from their cocoon. After emergence, freshly dead adult parasitoids were  
118 transferred to 95% alcohol to preserve the DNA for subsequent genetic analysis. For this study, we  
119 focused on the data on nests of larvae of *A. io*, *A. urticae*, and *A. levana*, and excluded data on *V. atalanta*  
120 as the species was not found to be parasitized by *P. confusa* [17]. For more details on the sampling  
121 protocol, sample size, winter diapause conditions, the complex of parasitoids and their relative  
122 distribution and abundance, see Audusseau et al. [17].

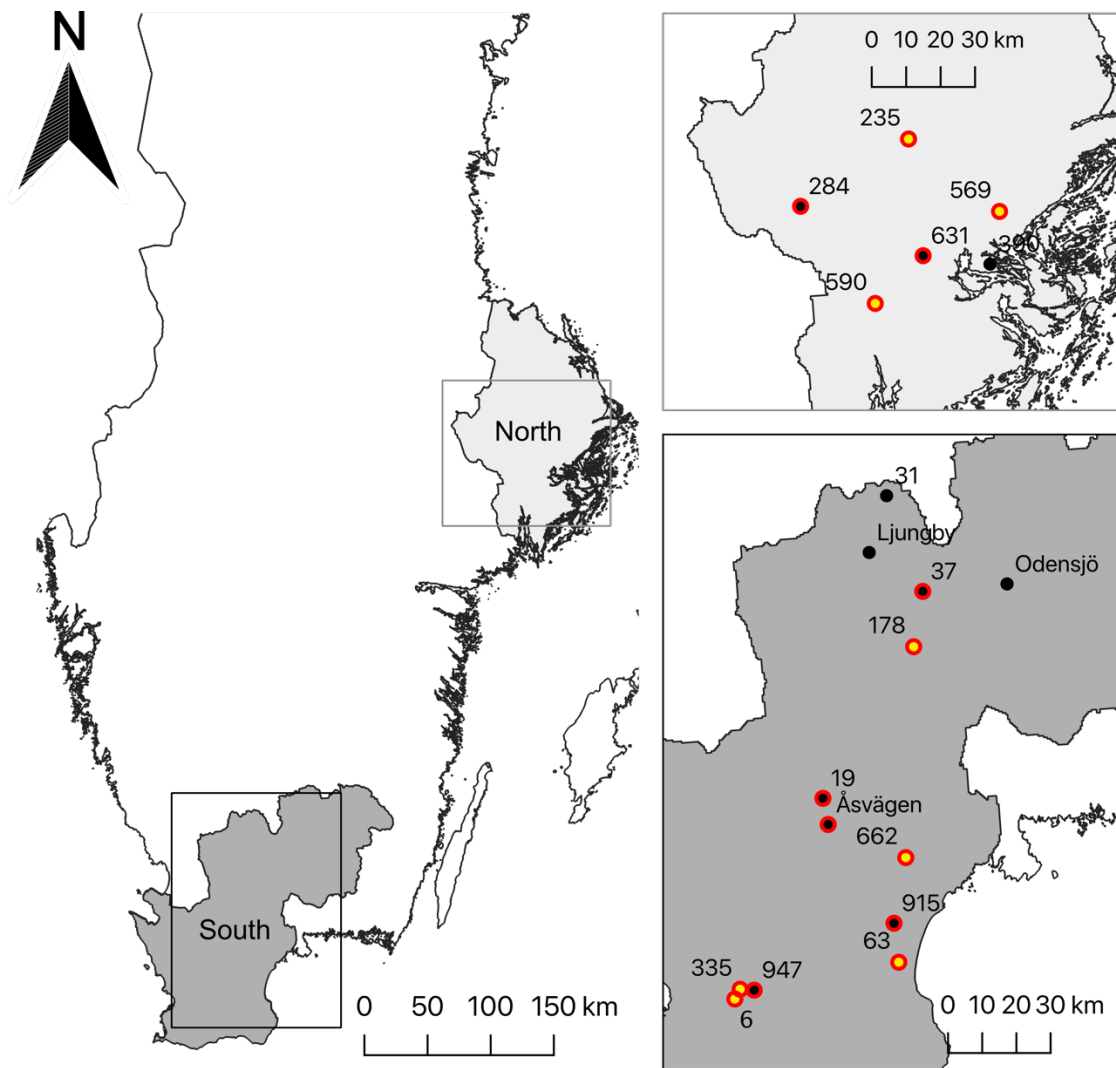

123 **Figure 1.** Map showing the 19 sites visited every two weeks during the two field campaigns (2017 and  
124 2018). The sites are grouped into two regions, southern Sweden and the Stockholm region to the north.  
125 The points represent the location of the 19 sampled sites. The dots circled in red and the dots in yellow  
126 correspond to the sites where, respectively, individuals of *P. confusa* and *A. urticae* were used for genetic  
127 analyses.

### 128 2.3. Phenological synchrony between *P. confusa* and its hosts

129 We studied the temporal co-occurrence between *P. confusa* and *A. urticae*, *A. io*, and *A. levana*; that  
130 is, the phenological overlap between the parasitoid and its hosts. Specifically, we investigated  
131 differences in overlap between butterfly hosts and regions (south versus north) and controlled for  
132 differences between years. The phenological overlap was modelled using a linear model. The initial  
133 model included all the two-way interactions and model selection followed a backward elimination  
134 procedure.

135 The phenological overlap between *P. confusa* and its three host butterflies, or Overlap Parasitoid-  
136 Host index (OPH), was measured at each site  $j$  as the sum over the sampling weeks  $k_{(1, \dots, 9)}$  of the  
137 minimum between the standardized abundance values of *P. confusa* ( $P_{j,k}$ ) and each of its hosts ( $H_{j,k}$ ) (eq.  
138 1). For *P. confusa*, standardized abundance data ( $P_{j,k}$ ) refers to the number of individuals (NP) collected  
139 for a given sampling week  $k$  and site  $j$  and expressed in proportion of the total number of individuals  
140 of that species collected on all the samplings at the site  $j$  (eq. 2). For the host butterfly species (*A. urticae*  
141 or *A. io*), standardized abundance data refers to the number of nests collected for a given sampling  
142 week  $k$  and site  $j$  and expressed in proportion of the total number of nests of that species (NH) collected

143 on all the samplings on the site  $j$  (eq. 3). The overlap index (OPH) is a parsimonious measure of the  
144 phenological overlap under the hypothesis that the parasitoid does not benefit from a surplus of  
145 resources [21]. The phenological overlap between species is calculated only when the two species,  
146 namely *P. confusa* and each of its hosts, were sampled at a site within a given year.  
147

$$OPH_j = \sum_{k=1}^9 \min(P_{j,k}, H_{j,k}), \quad (1)$$

$$P_{j,k} = \frac{NP_{j,k}}{\sum NP_j}, \quad (2)$$

$$H_{j,k} = \frac{NH_{j,k}}{\sum NH_j}, \quad (3)$$

#### 148 2.4. Pattern of attack

149 We investigated differences in *P. confusa* attack rates on its two main host butterflies, *A. urticae* and  
150 *A. io*, in two ways. First, we studied the proportion of butterfly nests parasitized by *P. confusa*. This  
151 analysis was restricted to butterfly nests sampled within the temporal window of occurrence of *P.*  
152 *confusa* (see Table S1) and at sites where *P. confusa* was observed at least once in the season ( $n = 359$   
153 nests). Second, we examined the proportion of larvae parasitized for each nest parasitized by *P. confusa*  
154 ( $n = 145$  nests). The proportion of butterfly nests parasitized and the proportion of larvae parasitized  
155 by *P. confusa* per nest were modelled with a binomial error distribution.

156 We analysed variations in parasitism rates according to butterfly host, region, larval instar at  
157 collection, the phenological overlap, the year and week of collection, and the total number of butterfly  
158 nests of both host butterflies (*A. io* and *A. urticae*) occurring in the week of sampling. Based on  
159 preliminary exploration of the data, we included a quadratic term for the sampling week and  
160 phenological overlap. We also included the two-way interactions between the butterfly host and the  
161 region, the year, the larval instar at collection, the total number of butterfly nests at sampling, and the  
162 two-way interaction between region and year. Because few nests were collected at 1<sup>st</sup> instar, we pooled  
163 them with nests collected at 2<sup>nd</sup> instar. Model selection followed a backward elimination procedure.  
164 Model diagnostics were assessed using the R package DHARMA [22].

#### 165 2.5. Habitat

166 We examined how habitat heterogeneity and fragmentation influenced the distribution of *P.*  
167 *confusa*. Using the models selected in the analyses of the proportion of butterfly nest parasitized and  
168 the proportion of larvae parasitized by *P. confusa* per nest (see above), we estimated the additional  
169 variance explained when including land cover variables. In the analyses, absences were informed by  
170 including data on butterfly nests collected at sites where *P. confusa* was not observed ( $n = 31$ ), but that  
171 were sampled during its period of activity (Table S1). Land cover heterogeneity was modelled as the  
172 percentage of arable land, vegetated open land (e.g. field, meadow, grassland, offering easy running),  
173 deciduous forests, and artificial surfaces (buildings and roads) within the vicinity of the nests sampled.  
174 Habitat fragmentation was estimated from the total length of the edges measured between habitat types  
175 in the landscape surrounding each sampled nest. Land use heterogeneity and fragmentation were  
176 extracted from a land cover map produced at 10 m resolution by Naturvårdsverket  
177 (<https://www.naturvardsverket.se/>). To assess the effect of land cover on the propensity and intensity  
178 of parasitism, we computed each metric within buffers of increasing radius (10, 20, 30, 40, 70, 100, 200  
179 and 500 meters) around each sampled nest. All metrics were calculated with the R packages sf [23] and  
180 raster [24]. The land cover classification of the Naturvårdsverket map followed the CORINE Land  
181 Cover level 3 (EEA, 2019). In our models, the proportion of butterfly nests parasitized and the  
182 proportion of larvae parasitized by *P. confusa* per nest were modelled with a binomial error distribution.  
183 Model selection followed a backward elimination procedure and models fit were assessed using the R  
184 package DHARMA [22].

## 185 2.6. Genetic structure of *P. confusa* and of *A. urticae*

186 The genetic structure of Swedish *P. confusa* and *A. urticae* were studied using two types of  
187 molecular markers, a fragment of the cytochrome c oxidase subunit (COI) mitochondrial gene and  
188 Amplified Fragment Length Polymorphism (AFLP). AFLPs have been commonly used to study the  
189 population genetic structure of species since the publication of the method by Vos et al. [25]. Although  
190 these dominant markers (defined by presence/absence) are less informative than Single Sequence  
191 Repeats (SSRs) or Single-Nucleotide Polymorphism (SNPs), AFLPs are more time efficient and less  
192 expensive, which make them suitable to study non-model species such as the ones examined here.  
193 Comparative studies have also shown that the genetic diversity found by SSRs and AFLPs are  
194 comparable, as the distribution over the entire nuclear genome of the latter counterbalances the  
195 performance of using a limited number of SSRs (<20 SSRs, [26]).

### 196 2.6.1. DNA extraction

197 DNA was extracted from whole body tissue of 89 adult *P. confusa* collected across 15 sites, and  
198 from abdominal material of 87 adult *A. urticae* (one butterfly individual per nest) collected across 8 sites  
199 spread across the latitudinal gradient using the NucleoSpin® 96 Tissue kit (Macherey-Nagel) (Figure  
200 1). After extraction, the DNA samples were quantified and assessed using a spectrophotometer  
201 (NanoDrop® ND-1000 UV-Vis; *Thermo Scientific*) and we measured concentrations of about 30 ng/μL.

### 202 2.6.2. Mitochondrial genetic variation

203 We sequenced the fragment of the COI gene proposed as a standard DNA barcode for animals [27]  
204 using LCO1490F and HCO2192R primers [28]. DNA sequencing was performed in both directions by  
205 Eurofins Genomics company and sequences were manually aligned using the BioEdit program. We  
206 estimated the diversity of haplotype and nucleotide using DNAsp v.5. software [29]. Afterwards, the  
207 relationships among haplotypes were examined using a haplotypic network constructed by a reduced-  
208 median algorithm [30] as implemented in the software NETWORK 4.1.1.1 (<https://www.fluxus-engineering.com/sharenet.htm>). We used a maximum parsimony algorithm to infer the most  
209 parsimonious branch connections between the haplotypes.  
210

### 211 2.6.3. Nuclear genetic variation

212 To study the nuclear genetic variation of *P. confusa*, only diploid females were used. Male  
213 Hymenoptera are haploids and carry only half of the genetic information that diploid females do. For  
214 this reason, using a mixture of both males and females could lead to ambiguous results. In addition,  
215 we genotyped only one individual per butterfly nest sampled in order to avoid genotyping of related  
216 individuals which would, potentially, reduce the genetic variability of our sample. We kept only non-  
217 ambiguous AFLP results, which led to a total of 39 *P. confusa* AFLP genotypes and 86 *A. urticae* AFLP  
218 genotypes.

219 We obtained the AFLP fragments from 600 ng of genomic DNA, digested successively with the  
220 TaqI and EcoRI restriction enzymes (1 h 30 at 65 and 37 °C., respectively for each enzyme). The digested  
221 DNA was incubated at 37 °C for 3 h in the presence of adapter pairs corresponding to both types of  
222 restriction sites and T4 DNA ligase enzyme (EcoRI top: 5'-CTCGTAGACTGCGTACC; EcoRI bottom:  
223 5-AATTGGTACGCAGTCTAC; TaqI top: 5'-GACGATGAGTCCTGAC; TaqI bottom 5'-  
224 CGGTCAGGACTCAT) before amplifying them by two successive PCRs using the EcoRI-A and TaqI-  
225 A primers, during the pre-selective PCR, and TaqI-AAC and EcoRI-AAC (FAM) primers, during  
226 selective PCR. The separation of the labelled AFLP fragments and the acquisition of the raw  
227 fluorescence data was performed by the "Genomics" platform of the Henri Mondor Institute by  
228 capillary electrophoresis (Applied Biosystem) in the presence of the LIZ 500 size marker. The obtained  
229 AFLP profiles were calibrated and analysed using the GeneMapper© software (Applied Biosystems).  
230 Eight individuals of *P. confusa*, and 12 individuals of *A. urticae* were genotyped twice to estimate the  
231 genotyping error rate. AFLP genotyping followed the protocol described elsewhere [31–33].

232 The genetic diversity statistics, i.e. proportion of variable markers and gene diversity based on  
233 Nei's formula [34], were calculated using AFLPdat program [35]. The spatial genetic structure for each  
234 of the two species were assessed by Bayesian inference, taking into account the multilocus AFLP  
235 genotype and the geographical coordinates of each individual [36], using the R package Geneland [37].  
236 Individuals were grouped into genetic clusters representing homogeneous gene pools without a priori  
237 information about individual origin. We ran 5 replicate runs, with the number of clusters, K, ranging  
238 from 1 to 15, of a model of correlated frequencies, i.e. taking into account the similarity of the frequency  
239 of alleles between populations. We ran 100,000 iterations and sampled every 100 iterations.

### 240 3. Results

#### 241 3.1. Patterns of occurrence of *P. confusa*

242 A total of 428 *P. confusa* individuals emerged from larvae collected from 146 different butterfly  
243 nests (Table 1), 257 in 2017 and 171 in 2018. *Phobocampe confusa* is the second most common parasitoid  
244 species found within our samples, beside *Pelatachina tibialis*, a weakly gregarious tachinid parasitoid of  
245 which we reared 1227 individuals out of the 526 butterfly larvae infested, collected from 165 different  
246 nests.

247 *Phobocampe confusa* was observed throughout the southern and northern regions of Sweden in both  
248 years, but its abundance in our samples varied between hosts, sites, counties and years (Table 1). Across  
249 sites and years, the abundance of *P. confusa* varied from 1 to 59 individuals per site in 2017 ( $18.21 \pm 3.56$ ,  
250 mean  $\pm$  se) and from 1 to 82 in 2018 ( $13.15 \pm 6.02$ , mean  $\pm$  se). The species was absent from two sites in  
251 both years, site 31 and Odensjö. Additionally, *P. confusa* was not present in Ljungby and site 915 in  
252 2017, and in 2018 it was absent from the sites 284, 569, 63, and Åsvägen. In our laboratory conditions,  
253 *P. confusa* adult emergence rate was of 29.0% with a total of 124 individuals that emerged, 48 males, 72  
254 females and 4 that we failed to sex. All the emergence of adults of *P. confusa* occurred within the year  
255 of its cocoon formation. The low rate of emergence after winter diapause is probably the result of  
256 suboptimal husbandry of wintering cocoons.

257 *Phobocampe confusa* is a solitary parasitoid, laying one egg per larval host in most cases.  
258 Nevertheless, we observed one case where a larva of *A. io* was parasitized by both *P. confusa* and  
259 *Blondelia nigripes*. *Aglais urticae* and *A. io* are the two main hosts of *P. confusa* among the four butterfly  
260 species we sampled. 231 *P. confusa* larvae egressed from the 2254 *A. urticae* larvae collected, 196 out of  
261 the 2259 *A. io*, and 2 out of the 1583 *A. levana*.

262 **Table 1.** Showing by region, year and butterfly host, and in order, in black the number of individuals of  
 263 *P. confusa* reared and the number of butterfly nests parasitized by *P. confusa*, and in grey the total number  
 264 of butterfly host larvae and the number of nests collected. Note that *A. levana* is not yet present in the  
 265 north.

| year | Region/host      | <i>A. urticae</i> | <i>A. io</i>    | <i>A. levana</i> | Total by region |
|------|------------------|-------------------|-----------------|------------------|-----------------|
| 2017 | North            | 65/22/374/57      | 81/30/589/70    | -                | 146/52/963/127  |
|      | South            | 82/34/612/68      | 27/10/605/45    | 2/1/712/69       | 111/45/1929/182 |
|      | Total by species | 147/56/986/125    | 108/40/1194/115 | 2/1/712/69       | 257/97/2892/309 |
| 2018 | North            | 6/4/598/58        | 11/3/379/26     | -                | 17/7/977/84     |
|      | South            | 78/23/669/66      | 76/19/685/63    | 0/0/871/98       | 154/42/2225/227 |
|      | Total by species | 84/27/1267/124    | 87/22/1064/89   | 0/0/871/98       | 171/49/3202/311 |

266

### 267 3.2. Phenological synchrony between *P. confusa* and its hosts

268 The phenological overlap between *P. confusa* and its hosts varies significantly between year,  
 269 butterfly hosts and region (Figure 2a, Table 2). While the phenological overlap between *P. confusa* and  
 270 *A. urticae* and *A. io* are comparable in the north (estimate =  $-0.11 \pm 0.11$ ,  $t = -0.94$ ,  $p = 0.35$ ), the overlap is  
 271 higher with *A. urticae* than with *A. io* in the southern region (estimate =  $0.388 \pm 0.147$ ,  $t = 2.65$ ,  $p = 0.010$ ),  
 272 and this for both years. Although we only recorded two cases where *P. confusa* parasitized *A. levana*,  
 273 the phenological overlap between *P. confusa* and its host *A. levana* is comparable to the overlap observed  
 274 for the native species *A. io* (estimate =  $-0.086 \pm 0.090$ ,  $t = -0.95$ ,  $p = 0.34$ , Figure 2).

275 We also observe a significant decrease in the phenological overlap between *P. confusa* and its hosts  
 276 in 2018 compared to 2017 (estimate =  $-0.144 \pm 0.063$ ,  $t = -2.31$ ,  $p = 0.024$ , Figure 2a, Table 2). This probably  
 277 reflects the considerable difference in temperature profiles between the two sampling years (Figure S1).  
 278 In fact, if we replace the year variable by the corresponding cumulative growing degree-days above  
 279 13°C from January 1<sup>st</sup> to August 31<sup>st</sup> (GDD13), model selection procedure results in the same best model  
 280 (SM 1). In contrast, precipitation from September to August (cumulative precipitation) is excluded from  
 281 the final model, although it varied significantly between 2017 and 2018 (SM1).

282 **Table 2.** Type II Anova table showing variation in phenological overlap between *P. confusa* and its hosts  
 283 according to host species, region (south and north), year, and the two-way interaction between region  
 284 and host species.  $R^2_{adj} = 24.9$ ,  $p < 0.001$ .

| Variables     | Sum sq | Df | F     | p            |
|---------------|--------|----|-------|--------------|
| Host          | 0.802  | 2  | 6.17  | <b>0.004</b> |
| Region        | 0.003  | 1  | 0.038 | 0.85         |
| Year          | 0.347  | 1  | 5.34  | <b>0.024</b> |
| Region x host | 0.458  | 1  | 7.04  | <b>0.010</b> |
| Residuals     | 4.031  | 62 |       |              |

285



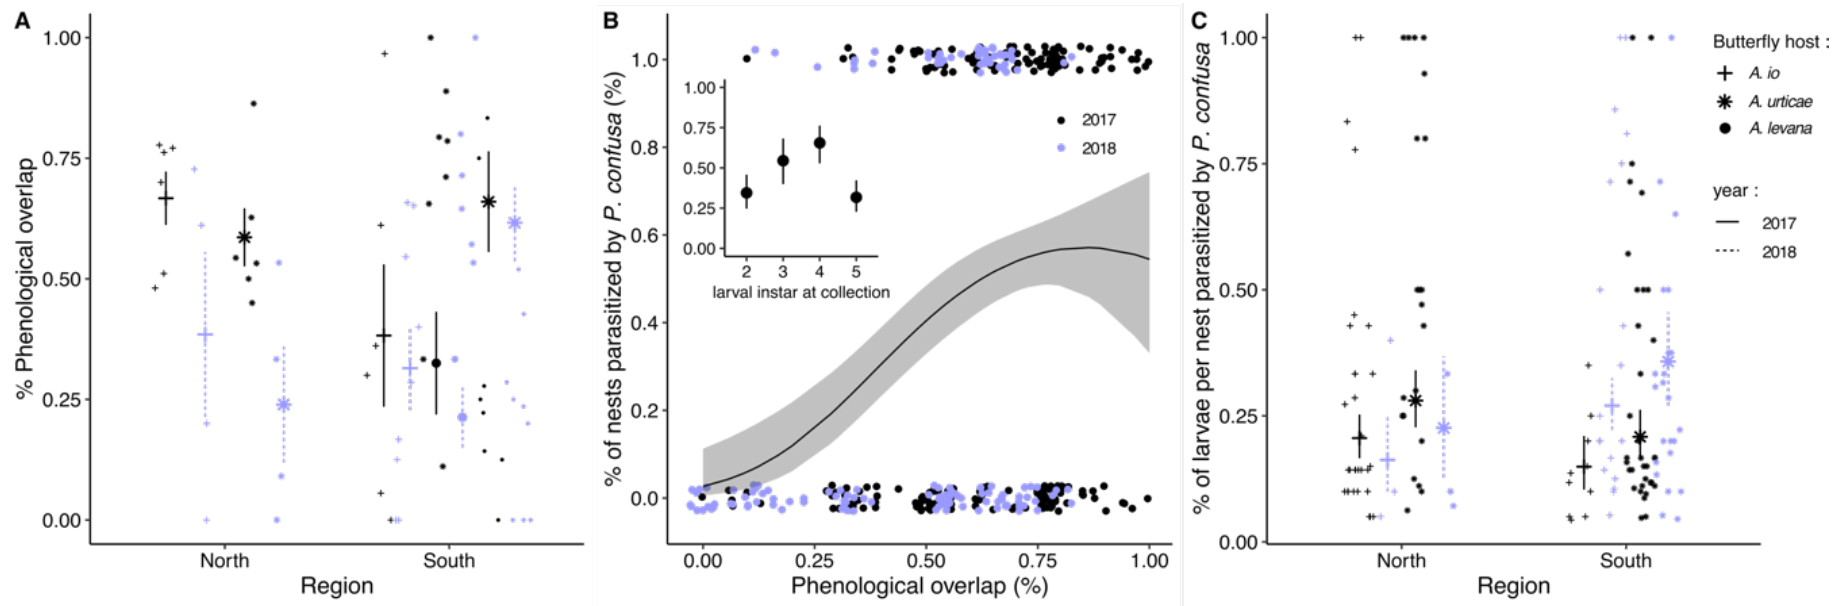

286 **Figure 2.** Plot showing (A) the phenological overlap between *P. confusa* and its hosts butterflies, *A. urticae*, *A. io* and *A. levana*, according to year and region; (B) the  
 287 proportion of nests parasitized according to the phenological overlap and larval instar at collection; (C) the proportion of larvae parasitized by *P. confusa*  
 288 *A. urticae* and *A. io* according to year and region. Dots represent the raw data, means  $\pm$  confidence intervals. In purple are the data for 2018, in black for 2017. The shape  
 289 of the dots refer to butterfly host species.

### 290 3.3. Pattern of attack

291 The proportion of butterfly nests parasitized by *P. confusa* significantly varies with the larval instar  
 292 at collection and shows a concave relationship with the phenological overlap (Table 3, Figure 2b). The  
 293 proportion of butterfly nests parasitized by *P. confusa* increases with increasing phenological overlap  
 294 and is higher for larval nests collected at the 3<sup>th</sup> and 4<sup>th</sup> instar than for larvae collected at the 1<sup>st</sup> and 2<sup>nd</sup>  
 295 instar and 5<sup>th</sup> instar (Figure 2b). While the proportion of butterfly nests parasitized by *P. confusa* do not  
 296 vary between the butterfly hosts, the proportion of larvae parasitized by *P. confusa* per nest is higher  
 297 for *A. urticae* nests than for *A. io* nests (estimate =  $0.41 \pm 0.18$ ,  $z = 2.27$ ,  $p = 0.024$ , Figure 2c). The proportion  
 298 of larvae parasitized by *P. confusa* also varies significantly between sampling years and this effect is  
 299 specific to region. While in the northern region, the proportion of larvae parasitized by *P. confusa* per  
 300 nest decreases between 2017 and 2018, the opposite is observed in the southern region (estimate =  $1.04$   
 301  $\pm 0.32$ ,  $z = 3.24$ ,  $p = 0.001$ ). The proportion of larvae parasitized by *P. confusa* per nest also varies with  
 302 the larval instar at collection (Table 3) and shows a concave relationship with the phenological overlap  
 303 and the week of sampling (estimate phenological overlap<sup>2</sup> =  $-4.47 \pm 1.47$ ,  $z = -3.04$ ,  $p = 0.002$ ; estimate  
 304 sampling week<sup>2</sup> =  $-0.09 \pm 0.04$ ,  $z = -2.61$ ,  $p = 0.009$ , table 3, Figure 2c).

305 **Table 3.** Type II Anova table showing variation in parasitism rate according to the butterfly host, region,  
 306 phenological overlap, larval instar at collection and the two-way interactions between the butterfly host  
 307 and region, phenological overlap, and larval instar at collection.

| Variables                         | Proportion of nest parasitized |    |          | Proportion of larvae parasitism per nest |    |          |
|-----------------------------------|--------------------------------|----|----------|------------------------------------------|----|----------|
|                                   | LR Chisq                       | Df | <i>p</i> | LR Chisq                                 | Df | <i>p</i> |
| Phenological overlap              | 14.40                          | 1  | < 0.001  | 10.40                                    | 1  | 0.001    |
| Phenological overlap <sup>2</sup> | 5.57                           | 1  | 0.018    | 9.83                                     | 1  | 0.002    |
| Instar at collection              | 25.78                          | 5  | < 0.001  | 8.38                                     | 3  | 0.039    |
| Butterfly species                 | -                              | -  | -        | 5.08                                     | 1  | 0.024    |
| Year                              | -                              | -  | -        | 5.25                                     | 1  | 0.022    |
| Week of sampling                  | -                              | -  | -        | 7.90                                     | 1  | 0.005    |
| Week of sampling <sup>2</sup>     | -                              | -  | -        | 7.36                                     | 1  | 0.007    |
| Region                            | -                              | -  | -        | 0.47                                     | 1  | 0.49     |
| Region x Year                     | -                              | -  | -        | 11.57                                    | 1  | < 0.001  |

### 308 3.4. Habitat

309 The effect of land cover heterogeneity and fragmentation is relatively constant between 10 to 200m  
 310 radius around the butterfly nests sampled, and is not detected at 500m radius, possibly due to the  
 311 overlap in landscape buffers around each butterfly nest at that scale. For this reason, we focus on the  
 312 results for the effect of land cover within a 100m buffer radius and present the details of the models for  
 313 each buffer zone as supplementary material (Table S2 & S3 in SM3). We find that the likelihood of a  
 314 butterfly nest to be parasitized by *P. confusa* decreases with increasing proportion of artificial surface  
 315 (estimate artificial surface 100m =  $-0.0467 \pm 0.022$ ,  $z = -2.17$ ,  $p = 0.030$ , Figure 3), whereas the proportion  
 316 of larvae parasitized by nest increases (estimate artificial surface 100m =  $0.026 \pm 0.011$ ,  $z = 2.54$ ,  $p = 0.024$ ,  
 317 Figure 3). We also observe a positive effect of the proportion of deciduous forest in the vicinity of the  
 318 nest on the proportion of larvae parasitized by nest (estimate deciduous 100m =  $0.018 \pm 0.005$ ,  $z = 3.39$ ,  
 319  $p < 0.001$ , Figure 3).

320 Note that this analysis focuses on the impact of land cover types well represented in the vicinity  
 321 of the nests sampled, which are arable land, vegetated open land (e.g. field, meadow and grassland),  
 322 deciduous forests, and artificial surfaces (building and road) (Figure S2). Although we initially selected  
 323 sampling sites in landscapes (1km radius) with diverse land covers, butterfly nests were located (within

324 10m) in 87.4% of the cases near open vegetated land and in 58.5% of the cases near deciduous forests,  
325 stressing the importance of these two land covers for the species (Figure S2).

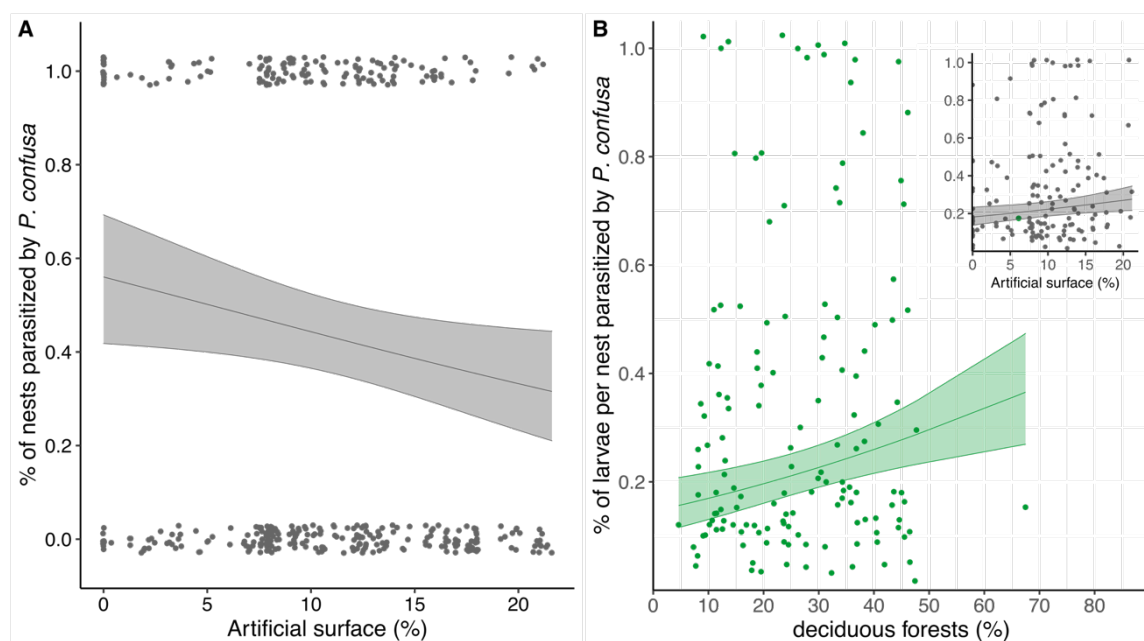

326 **Figure 3.** Plot showing (A) the proportion of nests parasitized according to the proportion of artificial  
327 surface within a buffer zone of 100m radius and (B) the proportion of larvae parasitized by *P. confusa*  
328 per nest according to the proportion of deciduous forests and artificial surface within a buffer zone of  
329 100m radius. Dots correspond to the raw data, means  $\pm$  confidence intervals correspond to the estimated  
330 marginal means from the model.

### 331 3.4. Genetic structure of *P. confusa* and of *A. urticae*

#### 332 3.4.1. Mitochondrial and nuclear genetic variation of *P. confusa*

333 For *P. confusa*, we obtained 88 sequences of a 613 bp fragment of the COI gene ([GenBank Accession](#)  
334 [Numbers](#)). We detect 5 haplotypes (Figure 4, Table 4) defined by 2 parsimony informative sites, among  
335 4 variable sites. The global haplotype diversity and nucleotide diversity are of 0.284 and 0.00051  
336 respectively. Over the 82 AFLPs fragments recorded, only 15 are polymorphic, for which no error of  
337 genotyping was observed in replicates. We observe extremely low genetic diversity indices in the North  
338 and South regions (Table 4). Bayesian inference revealed no genetic structuring and only one genetic  
339 cluster was identified by Geneland V 4.0.3 [37].

#### 340 3.4.2. Mitochondrial and nuclear genetic variation of *A. urticae*

341 For *A. urticae*, we obtained 86 sequences of a 603 bp fragment of the COI gene ([GenBank Accession](#)  
342 [Numbers](#)). We detect 11 haplotypes (Figure 4, Table 4) defined by 9 parsimony informative sites, among  
343 13 variable sites. The global haplotype diversity and nucleotide diversity are of 0.775 and 0.00349  
344 respectively. We obtained a total of 243 polymorphic AFLPs fragments with a very low genotyping  
345 error rate (< 1%). We do not observe a significant difference in gene diversity between regions (Table  
346 4). In addition, the Bayesian inference did not show a genetic structuring of our data, only one genetic  
347 cluster was identified by Geneland V 4.0.3 [37].

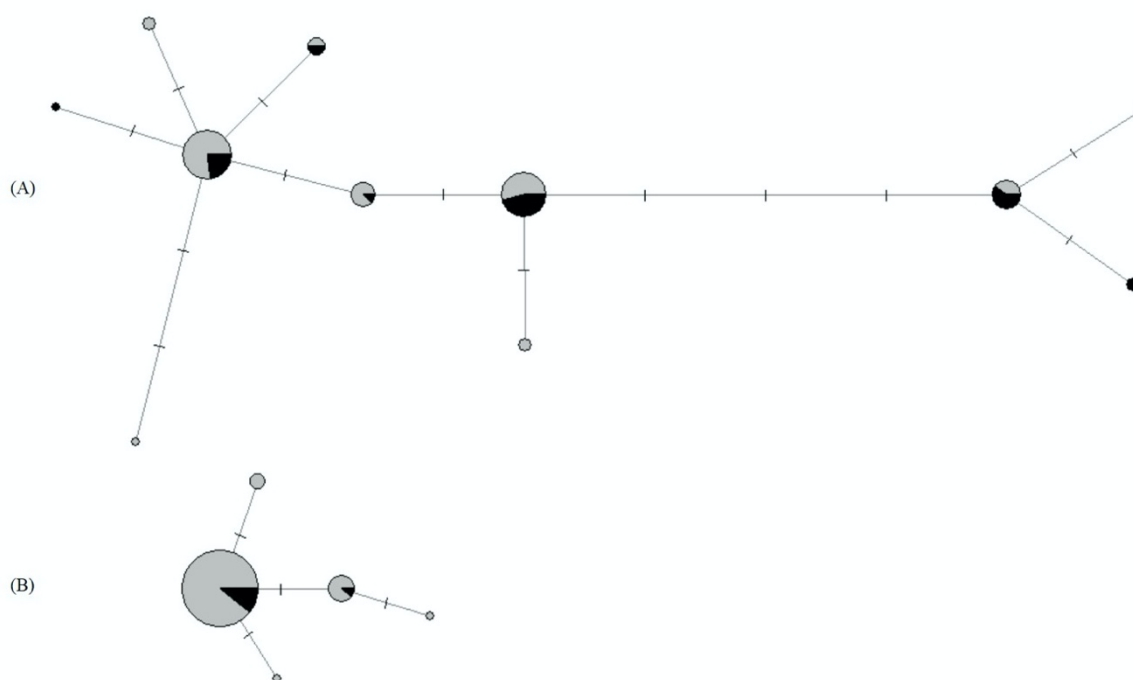

348 **Figure 4.** COI gene haplotype network for (A) *A. urticae* samples and (B) *P. confusa* samples. Circle size  
349 is relative to the proportion of each haplotype in the sample. Mutational steps are indicated by lines.  
350 Individuals collected in the South of Sweden are in grey, individuals collected in the North of Sweden  
351 are in black.

352 **Table 4.** Genetic variation within *A. urticae* and *P. confusa* populations estimated using COI  
 353 mitochondrial gene and AFLPs. Sample size ( $N_{COI}$  and  $N_{AFLP}$ ), number of COI haplotype ( $N_H$ ), number  
 354 of polymorphic site (NPS), haplotype diversity ( $H_d$ ), nucleotide diversity ( $\pi$ ), percentage of variable  
 355 markers (VM%) and gene diversity (Gdiv).

356

| Species           | Region       | Site         | Molecular data |          |              |                |                |             |              |              |
|-------------------|--------------|--------------|----------------|----------|--------------|----------------|----------------|-------------|--------------|--------------|
|                   |              |              | COI            |          |              |                |                | AFLPs       |              |              |
|                   |              |              | $N_{COI}$      | $N_H$    | NPS          | $H_d$          | $\pi$          | $N_{AFLP}$  | VM%          | Gdiv         |
| <i>A. urticae</i> | North        | 235          | 15             | 4        | 6            | 0.714          | 0.00370        | 15          | 54.3         | 0.147        |
|                   |              | 569          | 4              | 3        | 7            | 0.833          | 0.00608        | 5           | 26.3         | 0.124        |
|                   |              | 590          | 12             | 5        | 6            | 0.833          | 0.00440        | 11          | 49.0         | 0.138        |
|                   |              | <b>Total</b> | <b>31</b>      | <b>8</b> | <b>9</b>     | <b>0.800</b>   | <b>0.00428</b> | <b>31</b>   | <b>72.0</b>  | <b>0.144</b> |
|                   | South        | 6            | 24             | 6        | 7            | 0.688          | 0.00296        | 24          | 65.8         | 0.142        |
|                   |              | 63           | 6              | 2        | 3            | 0.533          | 0.00265        | 6           | 31.7         | 0.132        |
|                   |              | 178          | 3              | 2        | 3            | 0.667          | 0.00199        | 3           | 16.5         | 0.110        |
|                   |              | 335          | 7              | 3        | 2            | 0.762          | 0.00174        | 7           | 38.3         | 0.152        |
|                   |              | 662          | 15             | 5        | 7            | 0.748          | 0.00272        | 15          | 53.1         | 0.139        |
|                   |              | <b>Total</b> | <b>55</b>      | <b>8</b> | <b>10</b>    | <b>0.741</b>   | <b>0.00277</b> | <b>55</b>   | <b>87.2</b>  | <b>0.143</b> |
| <i>P. confusa</i> | North        | 235          | 2              | 1        | 0            | -              | -              | 2           | 3.66         | 0.036        |
|                   |              | 284          | 1              | 1        | -            | -              | -              | 0           | -            | -            |
|                   |              | 569          | 2              | 1        | 0            | -              | -              | 1           | -            | -            |
|                   |              | 590          | 3              | 1        | 0            | -              | -              | 2           | 4.88         | 0.049        |
|                   |              | 631          | 1              | 1        | -            | -              | -              | 1           | -            | -            |
|                   | <b>Total</b> | <b>9</b>     | <b>2</b>       | <b>1</b> | <b>0.222</b> | <b>0.00036</b> | <b>6</b>       | <b>8.54</b> | <b>0.040</b> |              |
|                   | South        | 6            | 50             | 3        | 2            | 0.251          | 0.00041        | 16          | 13.4         | 0.049        |
|                   |              | 19           | 1              | 1        | -            | -              | -              | 1           | -            | -            |
|                   |              | 37           | 1              | 1        | -            | -              | -              | 1           | -            | -            |
|                   |              | 63           | 6              | 1        | 0            | 0.000          | 0.00000        | 4           | 8.53         | 0.043        |
| 178               |              | 5            | 3              | 3        | 0.800        | 0.00259        | 2              | 4.87        | 0.049        |              |
| 335               |              | 10           | 1              | 0        | 0.000        | 0.00000        | 5              | 7.32        | 0.039        |              |
| Åsvägen           | 662          | 1            | 1              | -        | -            | -              | 0              | -           | -            |              |
|                   | 915          | 2            | 2              |          | 1.000        | 0.00162        | 1              | -           | -            |              |
|                   | 947          | 2            | 1              | 0        | 0.000        | 0.00000        | 2              | 2.44        | 0.024        |              |
|                   | Åsvägen      | 1            | 1              | -        | -            | -              | 1              | -           | -            |              |
|                   | <b>Total</b> | <b>79</b>    | <b>5</b>       | <b>4</b> | <b>0.294</b> | <b>0.00053</b> | <b>33</b>      | <b>15.8</b> | <b>0.045</b> |              |

#### 357 4. Discussion

358 The total number of larvae infected by *P. confusa* has decreased by 33.5 % between 2017 and 2018.  
359 This is not related to a reduction in host availability as, with comparable sampling effort, between  
360 the two years the number of butterfly larvae collected increased by 6.9 % for the two long-native host  
361 butterflies and by 10.72% when including *A. levana*. The observed decrease is most likely explained  
362 by the very peculiar climatic conditions recorded in 2018 as that year was exceptionally dry in  
363 Scandinavia with both an increase in average temperature over the season and lower precipitation  
364 (see SM 1). In turn, the variation in climatic conditions explains a large part of the observed decreased  
365 in phenological overlap between *P. confusa* and its native hosts. This decrease was most pronounced  
366 in the northern region and resulted in the low number of reared *P. confusa*. There, the proportion of  
367 native butterfly nests parasitized by *P. confusa* dropped from 40.9 % in 2017 (52 out of 127 native  
368 butterfly nests sampled) to 8.05 % in 2018 (7 out of 84 native butterfly nests sampled). In addition to  
369 the importance of the overlap between the phenology of the host butterflies and *P. confusa*, the  
370 probability of detecting a case of a nest parasitized by *P. confusa* is strongly influenced by the larval  
371 stage at the time of collection and was highest for the nests for which the larvae were collected in the  
372 fourth larval instar. We estimate the time window of attack of a larval host by *P. confusa* to be of at  
373 least a week in the wild and probably longer for *A. io* than *A. urticae* due to its longer development  
374 time (see SM 2). We did not find any difference between native species in the probability of a nest to  
375 be parasitized; however the intensity of parasitism, taken as the proportion of larvae parasitized per  
376 nest, differs between species and is significantly higher for *A. urticae* than for *A. io*. This result suggests  
377 that, at least in this study, *P. confusa* seems to favour *A. urticae* as host.

378 The large between-year variation in climatic profile highlights the potential impact of warming  
379 on our study system. Climate change is a challenge for ectothermic species such as parasitoids and  
380 their butterfly hosts. As they do not produce heat, their development and survival rely on the  
381 temperature of their habitat [38]. In Sweden, and more generally at higher latitudes where the  
382 magnitude of the warming is greater [39], we stronger effects of climate change. In that respect, we  
383 found a negative impact of the modification of the climatic profile in Sweden on *P. confusa*. This aligns  
384 with previous studies showing that specialist species, as is the case for *P. confusa*, are particularly  
385 sensitive to climatic unpredictability [40,41]. However, this contrasts with the overall pattern of  
386 parasitism as Audusseau et al. [17] reported a higher level of parasitism (all parasitoid species  
387 combined) in 2018. Alternatively, at northern latitudes the impact of climate change is modulated by  
388 the fact that most species are living at much lower temperature than their physiological optima and,  
389 for those, warming is expected to enhance individual fitness [42]. Most importantly, climate warming  
390 may alter life history traits of both the parasitoids and their hosts [38,43,44], causing rapid mismatch  
391 in the phenology of these interacting species [45], as shown in our data. Host use might also be  
392 affected by the warming. In that respect, it is important to stress that *A. levana* has recently established  
393 in Sweden, probably as a result of climate warming [20]. Here, we only reported two cases of *A. levana*  
394 larvae parasitized by *P. confusa*. This low level of parasitism might be explained by the enemy release  
395 hypothesis [46,47], which predicts that when establishing in a new area, the species escape their  
396 natural enemies until the local parasite complex recolonizes the species. However, *A. levana* is a  
397 potential host for *P. confusa* and the phenologies of these two species greatly overlap in Sweden,  
398 suggesting that *A. levana* could provide a refuge for *P. confusa* at a time when the native hosts are  
399 rare. Future monitoring of parasitism in *A. levana* and comparative data on the attack rate by *P. confusa*  
400 on *A. levana* in other parts of the butterfly's range, and where the species are known to co-occur,  
401 would be insightful in that respect.

402 We found that butterfly nests and, therefore *P. confusa*, preferentially occur in habitat  
403 characterized by vegetated open land and where deciduous forests are found in the close vicinity. At  
404 a scale of 10 m radius around the butterfly nests sampled, the surrounding habitat of 87.4% of the  
405 nests included open vegetated land and for 58.5% deciduous forests. Association with these habitats  
406 might partly be explained by the pattern of distribution of nettles, *Urtica dioica*, the (practically  
407 exclusive) host plants of these butterflies. Nettles, common in northern Europe, are found in a diverse

408 range of habitats but preferentially in nutrient-rich soils and in sites with moderate shading [48]. They  
409 are also found in deciduous woodland when the earth soil properties and insolation conditions are  
410 sufficient [48], but our field experience in Sweden showed that butterfly nests are generally found on  
411 nettle stands located along field edges of cultivated land or roads, in grasslands, meadows, and  
412 grazed fields, habitats classified as open vegetated land in the CORINE Land Cover classification  
413 (level 3). While this suggests a reduced importance of deciduous forest, this habitat could play an  
414 important role and provide a good refuge for the species. This is supported by the observed increase  
415 in the proportion of larvae parasitized per nests in landscapes with higher proportion of deciduous  
416 forest. We further detected a significant impact of the proportion of artificial surface on the occurrence  
417 of *P. confusa*. The probability of a butterfly nest to be parasitized by *P. confusa* decreased significantly  
418 with increased proportion of artificial surface, but the proportion of larvae parasitized per nest  
419 significantly increases. Other studies have shown that parasitoids suffer from environmental changes  
420 such as habitat fragmentation and habitat loss (e.g. [14,12,49]). We did not detect a specific effect of  
421 fragmentation, but fragmentation is highly correlated with the proportion of artificial surface (within  
422 a buffer of 100m radius,  $R^2 = 0.65$ ,  $p < 0.001$ ), which has a significant negative impact on the propensity  
423 of a nest to be parasitized. The mechanisms by which artificial surfaces influence the distribution of  
424 *P. confusa* are difficult to assess and would require further experiments. Among the potential  
425 explanations, the alteration (and unevenly) of the nutritional content of nettles at close proximity to  
426 human habitation, or habitat fragmentation, may alter the parasitoids searching behaviour and their  
427 ability to find a nettle patch and/or might be associated with a higher mortality during the  
428 overwintering period, weakening the local populations (reviewed in [50]). The position of parasitoids  
429 in the food chain further increases their vulnerability to environmental changes [3,5].

430 To date, no genetic data have been made available for *P. confusa*. Here, we show that the COI  
431 genetic diversity is extremely low in this species, at least within the geographical scale of our study.  
432 We found only five different haplotypes which diverged by no more than 3 mutational steps (Figure  
433 4). The lack of variability, which was confirmed at the nuclear level using AFLPs data, could suggest  
434 a recent spread of bottlenecked populations or could be the result of inbreeding. Population genetic  
435 theory indeed demonstrates that inbreeding is possible in haplodiploids [51] because the purging of  
436 deleterious and lethal mutations through haploid males reduces inbreeding depression (i.e. the lower  
437 fitness of offspring of genetically related parents compared to that of unrelated parents [52]). Solitary  
438 haplodiploid species, such as *P. confusa*, are however assumed to be primarily outbred while  
439 gregarious haplodiploid wasps (i.e. those that deposit more than one egg per host) are more likely to  
440 have a history of inbreeding [53]. This lack of genetic variability made it impossible to discern a  
441 population structure for *P. confusa* at the geographical scale of our study. In comparison, the COI  
442 genetic diversity observed in our samples of *A. urticae* was higher, with a total of 11 haplotypes  
443 (Figure 4). Although an important number of polymorphic AFLPs fragments (243) were obtained in  
444 our dataset, the spatial genetic analysis did not reveal any population genetic structure in *A. urticae*.  
445 This result is in concordance with previous studies on *A. urticae*, wherein long-distance gene flow is  
446 suggested to be important in this species. Using allozyme loci, Vandewoestijne et al. [54] have  
447 suggested that the population genetic structure of *A. urticae* at a regional scale is characterized by  
448 high movement rates between neighbouring patches, long-distance migration and rare  
449 extinction/recolonization events. A more recent study using mitochondrial sequences of the  
450 cytochrome c oxidase I mitochondrial gene (COI) and the control region showed that at the scale of  
451 the distribution of the species high gene flow is the primary factor shaping its population genetic  
452 structure [55].

453 Further studies at a larger geographical scale are needed to fully understand the relationship  
454 between the population genetic structure of *P. confusa* and that of its host, since the dispersal ability  
455 of the host *A. urticae* is larger than the geographical scale investigated in this study. Although AFLPs  
456 was successfully used in this study (i.e. we obtained more than 250 polymorphic markers in the  
457 lepidopteran host), high-resolution genomics tools, such as restriction- site DNA sequencing  
458 (RADseq, [56]), could provide additional information. Here, we highlight that further genetic studies  
459 on *P. confusa* and on all its potential hosts are required to understand the pattern of distribution of

460 the species in the landscape in relation to that of its hosts. This would also allow further investigations  
461 of the dispersal ability of this species, an essential component for conservation ecology perspectives.

## 462 5. Conclusions

463 In this study, we focused on a parasitic hymenopteran, which represents one of the most species-  
464 rich insect groups [57], to provide insights into the ecology and the genetics of *Phobocampe confusa*, in  
465 relation to the one of its host butterflies in Sweden. So far, our knowledge of the ecology of this  
466 parasitoid was mainly limited to the work from Pyörnilä [58] (in which *P. confusa* was misidentified  
467 as *Hyposoter horticolae*), although the species causes high mortality rates in very common and  
468 emblematic butterfly species in Europe. In particular, we showed that the occurrence of *P. confusa*  
469 relies on its phenological match with its host butterflies. It attacks similarly nests of *A. urticae* and *A.*  
470 *io*; however the proportion of larvae parasitized per nest is higher for *A. urticae*. Within our sample,  
471 the species occurred preferentially in vegetated open land and showed a high dependence on the  
472 occurrence of deciduous forests in the near surrounding. Artificial surfaces, however, seem to have a  
473 negative impact on the distribution of *P. confusa*. The genetic analyses did not reveal a population  
474 genetic structure in our study population, and further work is required to understand what is  
475 structuring the population genetics of *P. confusa*, understand its dispersal abilities and its biotic  
476 interactions with its hosts. Such knowledge is crucial to further our understanding of the factors and  
477 mechanisms shaping the stability and the functioning of natural ecosystems, including for  
478 conservation efforts.

## 479 Supplementary Materials:

480 Supplementary Material 1: Climatic variations between years and counties; Supplementary Material 2:  
481 Phenology and temporal window of attack of the host by *P. confusa*; Supplementary Material 3: Habitat  
482 characteristics associated with *P. confusa* occurrence for buffer zone radii varying from 10 to 500 m.

483 **Author Contributions:** Conceptualization, H.A., L.D. and R.S.; Data collection, H.A and N.K.; taxonomic  
484 identification, M.R.S; Ecological analyses H.A., G.B., and M.R.S.; Genetic Analyses, G.B. and L.D; Funding  
485 acquisition H.A. and L.D.; H.A. and L.D. have written the original draft and all the authors contributed  
486 substantially to the revisions; All authors have agreed to the published version of the manuscript.

487 **Funding:** This research was funded by Vetenskapsrådet (BioInt grant : 2016-06737 to Hélène Audusseau) and by  
488 the French Foundation for Research on Biodiversity and its partners (FRB - [www.fondationbiodiversite.fr](http://www.fondationbiodiversite.fr)).

489 **Acknowledgments:** We acknowledge the E-OBS dataset from the EU-FP6 project UERRA (<http://www.uerra.eu>)  
490 and the Copernicus Climate Change Service, and the data providers in the ECA&D project  
491 (<https://www.ecad.eu>). We thank Saskya van Nouhuys for enlightening discussions and Maria de la Paz Celorio-  
492 Mancera and Nils Ryrholm for their assistance in this project.

493 **Conflicts of Interest:** The authors declare no conflict of interest.

## 494 References

- 495 1. Gauld, I.D.; Wahl, D.B.; Broad, G.R. The suprageneric groups of the Pimplinae (Hymenoptera:  
496 Ichneumonidae): a cladistic re-evaluation and evolutionary biological study. *Zool J Linn Soc* **2002**, *136*, 421–485,  
497 doi:10.1046/j.1096-3642.2002.00031.x.
- 498 2. LaSalle, J.; Gauld, I.D. Parasitic Hymenoptera and the biodiversity crisis. *Redia* **1991**, *74*, 315–334.
- 499 3. Shaw, M.R.; Hochberg, M.E. The neglect of parasitic Hymenoptera in insect conservation strategies: the  
500 British fauna as a prime example. *Journal of Insect Conservation* **2001**, *5*, 253–263.
- 501 4. Shaw, M.R. Habitat considerations for parasitic wasps (Hymenoptera). *Journal of Insect Conservation*  
502 **2006**, *10*, 117–127.
- 503 5. LaSalle, J.; Gauld, I.D. Hymenoptera: their biodiversity, and their impact on the diversity of other  
504 organisms. *Hymenoptera and biodiversity*. **1993**, 1–26.
- 505 6. Shaw, M.R.; Stefanescu, C.; Van Nouhuys, S. Parasitoids of European butterflies. **2009**.
- 506 7. Schwarzfeld, M.D. Ichneumonidae (Hymenoptera) of the Canadian Prairies Ecozone: A Review.  
507 *Arthropods of Canadian grasslands* **2014**, *4*, 317–397.



- 508 8. Cronin, J.T.; Reeve, J.D. Host–parasitoid spatial ecology: a plea for a landscape-level synthesis.  
509 *Proceedings of the Royal Society B: Biological Sciences* **2005**, *272*, 2225–2235, doi:10.1098/rspb.2005.3286.
- 510 9. Wei, S.-J.; Zhou, Y.; Fan, X.-L.; Hoffmann, A.A.; Cao, L.-J.; Chen, X.-X.; Xu, Z.-F. Different genetic  
511 structures revealed resident populations of a specialist parasitoid wasp in contrast to its migratory host. *Ecology*  
512 *and evolution* **2017**, *7*, 5400–5409.
- 513 10. Ewers, R.M.; Didham, R.K. Confounding factors in the detection of species responses to habitat  
514 fragmentation. *Biological reviews* **2006**, *81*, 117–142.
- 515 11. Quicke, D.L. Part III Ecology and Diversity. In *The braconid and ichneumonid parasitoid wasps: biology,*  
516 *systematics, evolution and ecology*; John Wiley & Sons, 2015; pp. 467–471 ISBN 1-118-90705-1.
- 517 12. Laliberté, E.; Tylianakis, J.M. Deforestation homogenizes tropical parasitoid–host networks. *Ecology*  
518 **2010**, *91*, 1740–1747.
- 519 13. Kruess, A.; Tscharntke, T. Habitat fragmentation, species loss, and biological control. *Science* **1994**, *264*,  
520 1581–1584.
- 521 14. Kruess, A.; Tscharntke, T. Species richness and parasitism in a fragmented landscape: experiments and  
522 field studies with insects on *Vicia sepium*. *Oecologia* **2000**, *122*, 129–137.
- 523 15. Van Nouhuys, S.; Hanski, I. Colonization rates and distances of a host butterfly and two specific  
524 parasitoids in a fragmented landscape. *Journal of Animal Ecology* **2002**, *71*, 639–650.
- 525 16. Couchoux, C.; Seppä, P.; Van Nouhuys, S. Strong dispersal in a parasitoid wasp overwhelms habitat  
526 fragmentation and host population dynamics. *Molecular ecology* **2016**, *25*, 3344–3355.
- 527 17. Audusseau, H.; Ryrholm, N.; Stefanescu, C.; Tharel, S.; Jansson, C.; Champeaux, L.; Shaw, M.R.; Raper,  
528 C.; Lewis, O.T.; Janz, N.; et al. Altered parasitism of a butterfly assemblage associated with a range-expanding  
529 species. *bioRxiv* **2020**, 2020.02.13.947440, doi:10.1101/2020.02.13.947440.
- 530 18. Shaw, M.R.; Horstmann, K.; Whiffin, A.L. Two hundred and twenty-five species of reared western  
531 Palaearctic Campopleginae (Hymenoptera: Ichneumonidae) in the National Museums of Scotland, with  
532 descriptions of new species of *Campoplex* and *Diadegma*, and records of fifty-five species new to Britain.  
533 *Entomologist's Gazette* **2016**, *66*, 245–247.
- 534 19. Wiemers, M.; Chazot, N.; Wheat, C.W.; Schweiger, O.; Wahlberg, N. A complete time-calibrated multi-  
535 gene phylogeny of the European butterflies. *ZooKeys* **2020**, 844175.
- 536 20. Eliasson, C.U.; Ryrholm, N.; Gärdenfors, U. *Nationalnyckeln till Sveriges flora och fauna: Fjärilar.*  
537 *Dagfjärilar: (Hesperiidae - Nymphalidae)*; ArtDatabanken, Sveriges lantbruksuniversitet, 2005;
- 538 21. Lindén, A. Adaptive and nonadaptive changes in phenological synchrony. *Proceedings of the National*  
539 *Academy of Sciences* **2018**, *115*, 5057–5059.
- 540 22. Hartig, F. *DHARMA: residual diagnostics for hierarchical (multi-level/mixed) regression models*; 2020;
- 541 23. Pebesma, E. Simple features for R: standardized support for spatial vector data. *The R Journal* **2018**, *10*,  
542 439–446.
- 543 24. Hijmans, R.J. *raster: Geographic Data Analysis and Modeling*; 2019;
- 544 25. Vos, P.; Hogers, R.; Bleeker, M.; Reijans, M.; Lee, T. van de; Hornes, M.; Friters, A.; Pot, J.; Paleman, J.;  
545 Kuiper, M. AFLP: a new technique for DNA fingerprinting. *Nucleic acids research* **1995**, *23*, 4407–4414.
- 546 26. Meudt, H.M.; Clarke, A.C. Almost forgotten or latest practice? AFLP applications, analyses and  
547 advances. *Trends in plant science* **2007**, *12*, 106–117.
- 548 27. Hebert, P.D.N.; Ratnasingham, S.; de Waard, J.R. Barcoding animal life: cytochrome c oxidase subunit  
549 1 divergences among closely related species. *Proceedings of the Royal Society of London. Series B: Biological Sciences*  
550 **2003**, *270*, S96–S99, doi:10.1098/rsbl.2003.0025.
- 551 28. Folmer, O.; Black, M.; Hoeh, W.; Lutz, R.; Vrijenhoek, R. DNA primers for amplification of  
552 mitochondrial cytochrome c oxidase subunit I from diverse metazoan invertebrates. *Molecular marine biology and*  
553 *biotechnology* **1994**, *3*, 294–299.
- 554 29. Librado, P.; Rozas, J. DnaSP v5: a software for comprehensive analysis of DNA polymorphism data.  
555 *Bioinformatics* **2009**, *25*, 1451–1452.
- 556 30. Bandelt, H.J.; Forster, P.; Sykes, B.C.; Richards, M.B. Mitochondrial portraits of human populations  
557 using median networks. *Genetics* **1995**, *141*, 743–753.
- 558 31. Ajmone-Marsan, P.; Vecchiotti-Antaldi, G.; Bertoni, G.; Valentini, A.; Cassandro, M.; Kuiper, M.  
559 AFLP™ markers for DNA fingerprinting in cattle. *Animal Genetics* **1997**, *28*, 418–426, doi:10.1111/j.1365-  
560 2052.1997.00204.x.

- 561 32. Baus, E.; Darrock, D.J.; Bruford, M.W. Gene-flow patterns in Atlantic and Mediterranean populations  
562 of the Lusitanian sea star *Asterina gibbosa*. *Molecular Ecology* **2005**, *14*, 3373–3382, doi:10.1111/j.1365-  
563 294X.2005.02681.x.
- 564 33. King, R.A.; Tibble, A.L.; Symondson, W.O. Opening a can of worms: unprecedented sympatric cryptic  
565 diversity within British lumbricid earthworms. *Molecular ecology* **2008**, *17*, 4684–4698.
- 566 34. Nei, M. *Molecular evolutionary genetics*; Columbia university press, 1987; ISBN 0-231-06321-0.
- 567 35. Ehrlich, D. aflpdat: a collection of r functions for convenient handling of AFLP data. *Molecular Ecology*  
568 *Notes* **2006**, *6*, 603–604, doi:10.1111/j.1471-8286.2006.01380.x.
- 569 36. Guillot, G.; Santos, F. Using AFLP markers and the Geneland program for the inference of population  
570 genetic structure. *Molecular Ecology Resources* **2010**, *10*, 1082–1084, doi:10.1111/j.1755-0998.2010.02864.x.
- 571 37. Guillot, G.; Mortier, F.; Estoup, A. Geneland: a computer package for landscape genetics. *Molecular*  
572 *Ecology Notes* **2005**, *5*, 712–715, doi:10.1111/j.1471-8286.2005.01031.x.
- 573 38. Hance, T.; van Baaren, J.; Vernon, P.; Boivin, G. Impact of Extreme Temperatures on Parasitoids in a  
574 Climate Change Perspective. *Annual Review of Entomology* **2007**, *52*, 107–126,  
575 doi:10.1146/annurev.ento.52.110405.091333.
- 576 39. IPCC, 2013: Climate Change 2013: The Physical Science Basis. Contribution of Working Group I to the  
577 Fifth Assessment Report of the Intergovernmental Panel on Climate Change 2013.
- 578 40. Stireman, J.O.; Dyer, L.A.; Janzen, D.H.; Singer, M.S.; Lill, J.T.; Marquis, R.J.; Ricklefs, R.E.; Gentry, G.L.;  
579 Hallwachs, W.; Coley, P.D. Climatic unpredictability and parasitism of caterpillars: implications of global  
580 warming. *Proceedings of the National Academy of Sciences* **2005**, *102*, 17384–17387.
- 581 41. Jeffs, C.T.; Lewis, O.T. Effects of climate warming on host–parasitoid interactions. *Ecological Entomology*  
582 **2013**, *38*, 209–218.
- 583 42. Deutsch, C.A.; Tewksbury, J.J.; Huey, R.B.; Sheldon, K.S.; Ghalambor, C.K.; Haak, D.C.; Martin, P.R.  
584 Impacts of climate warming on terrestrial ectotherms across latitude. *PNAS* **2008**, *105*, 6668–6672,  
585 doi:10.1073/pnas.0709472105.
- 586 43. Schreven, S.J.; Frago, E.; Stens, A.; De Jong, P.W.; Van Loon, J.J. Contrasting effects of heat pulses on  
587 different trophic levels, an experiment with a herbivore–parasitoid model system. *PLoS one* **2017**, *12*.
- 588 44. Tougeron, K.; Damien, M.; Le Lann, C.; Brodeur, J.; van Baaren, J. Rapid responses of winter aphid-  
589 parasitoid communities to climate warming. *Frontiers in Ecology and Evolution* **2018**, *6*, 173.
- 590 45. Dyer, L.A.; Richards, L.A.; Short, S.A.; Dodson, C.D. Effects of CO<sub>2</sub> and Temperature on Tritrophic  
591 Interactions. *PLoS One* **2013**, *8*, doi:10.1371/journal.pone.0062528.
- 592 46. Jeffries, M.J.; Lawton, J.H. Enemy free space and the structure of ecological communities. *Biological*  
593 *Journal of the Linnean Society* **1984**, *23*, 269–286.
- 594 47. Keane, R.M.; Crawley, M.J. Exotic plant invasions and the enemy release hypothesis. *Trends in ecology*  
595 *& evolution* **2002**, *17*, 164–170.
- 596 48. Taylor, K. Biological flora of the British Isles: *Urtica dioica* L. *Journal of Ecology* **2009**, *97*, 1436–1458.
- 597 49. Corcos, D.; Cerretti, P.; Caruso, V.; Mei, M.; Falco, M.; Marini, L. Impact of urbanization on predator  
598 and parasitoid insects at multiple spatial scales. *PLoS One* **2019**, *14*, doi:10.1371/journal.pone.0214068.
- 599 50. Quicke, D.L. Part I Morphology and Biology, chapter 8 Host location, associative learning and host  
600 assessment. In *The braconid and ichneumonid parasitoid wasps: biology, systematics, evolution and ecology*; John Wiley  
601 & Sons, 2015; pp. 127–136 ISBN 1-118-90705-1.
- 602 51. Werren, J.H. The evolution of inbreeding in haplodiploid organisms. *The natural history of inbreeding and*  
603 *outbreeding* **1993**, 42–59.
- 604 52. Charlesworth, D.; Charlesworth, B. Inbreeding depression and its evolutionary consequences. *Annual*  
605 *review of ecology and systematics* **1987**, *18*, 237–268.
- 606 53. Henter, H.J. Inbreeding depression and haplodiploidy: experimental measures in a parasitoid and  
607 comparisons across diploid and haplodiploid insect taxa. *Evolution* **2003**, *57*, 1793–1803.
- 608 54. Vandewoestijne, S.; Nève, G.; Baguette, M. Spatial and temporal population genetic structure of the  
609 butterfly *Aglais urticae* L. (Lepidoptera, Nymphalidae). *Molecular Ecology* **1999**, *8*, 1539–1543.
- 610 55. Vandewoestijne, S.; Baguette, M.; Brakefield, P.M.; Saccheri, I.J. Phylogeography of *Aglais urticae*  
611 (Lepidoptera) based on DNA sequences of the mitochondrial COI gene and control region. *Molecular*  
612 *Phylogenetics and Evolution* **2004**, *31*, 630–646.
- 613 56. Davey, J.W.; Blaxter, M.L. RADSeq: next-generation population genetics. *Brief Funct Genomics* **2010**, *9*,  
614 416–423, doi:10.1093/bfgp/elq031.

- 615 57. Gaston, K.J. The Magnitude of Global Insect Species Richness. *Conservation Biology* **1991**, *5*, 283–296,  
616 doi:10.1111/j.1523-1739.1991.tb00140.x.  
617 58. Pyornila, M. Parasitism in *Aglais urticae* (L.) (Lep., Nymphalidae). III. Parasitism of larval stages by  
618 ichneumonids. **1976**.  
619
